# Supplementary material for: Iterative improvement in the automatic modular design of robot swarms
Source: PeerJ journal article supplement (doi:10.7717/peerj-cs.322), 2020-12-07
Supplement: argos3-epuck.zip [file argos3-epuck.zip]

The *argos3-epuck* plugin has been developed at IRIDIA, *Université libre de Bruxelles*, also thanks to funding received from the European Research Council (ERC) under the European Union's Horizon 2020 research and innovation programme (ERC Consolidator project *Demiurge*: grant agreement No 681872)

**Main contributors:**

- Lorenzo Garattoni
- Gianpiero Francesca
- Carlo Pincioli
- Mauro Birattari

**Other contributors:**

- Antoine Ligot
- Arne Brutschy
- Manuele Brambilla
- Brian Delhaisse
- Xavier Deschuyteneer
- Matteo Amaducci
- Davide Vichi
